# Supplementary material for: Nanotherapeutic Modulation of Human Neural Cells and Glioblastoma in Organoids and Monocultures
Source: Cells. 2020 Nov 7;9(11):2434. doi: 10.3390/cells9112434 (PMC7695149; doi:10.3390/cells9112434)
Supplement: Supplementary file 1 [file cells-09-02434-s001.pdf]

## **Supplemental materials**

Nanotherapeutic modulation of human neural cells and glioblastoma in organoids and monocultures

Issan Zhang, Paula Lépine, Chanshuai Han, María Lacalle-Aurioles, Carol X.-Q. Chen, Rainer Haag, Thomas M. Durcan and Dusica Maysinger

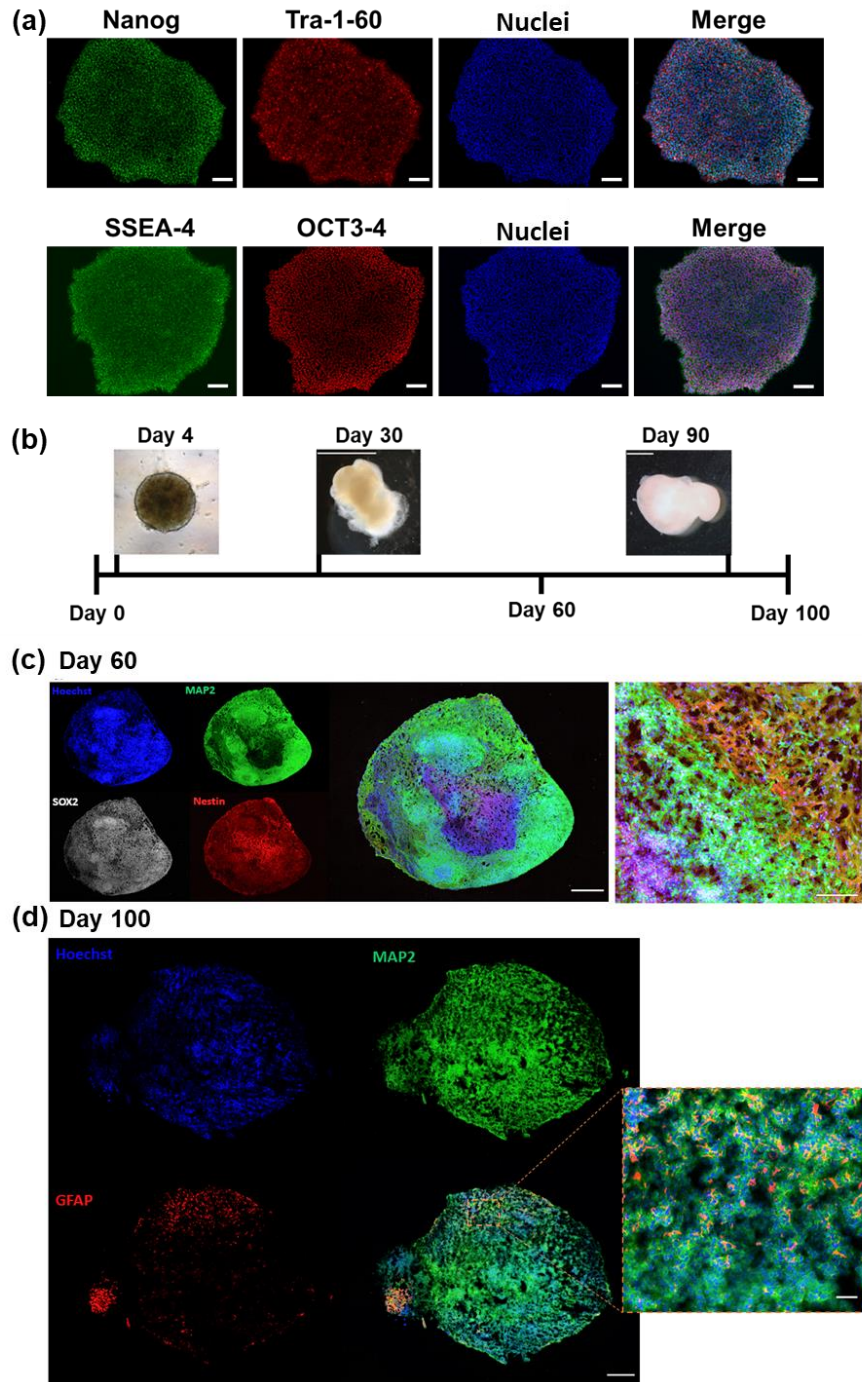

**Figure S1. (a)** Expression of pluripotency markers in human iPSCs. Immunofluorescence images of NCRM1 cells labelled for the pluripotency markers SSEA-4, Oct3-4, Nanog and Tra-1-60 with nuclear staining (DAPI). Scale bar: 200  $\mu$ m. **(b)** Timeline of cerebral organoid growth and development from iPSCs, over 100 days. **(c,d)** Stemness (SOX2, Nestin) and neural markers in cerebral organoids at days 60 and 100. Immunofluorescence staining for mature neurons expressing microtubule associated protein 2 (MAP2) and astrocytes expressing glial fibrillary acidic protein (GFAP). Staining of cell nuclei with Hoechst 33342. Scale bar: 200  $\mu$ m (for higher magnification: scale bar: 25  $\mu$ m).

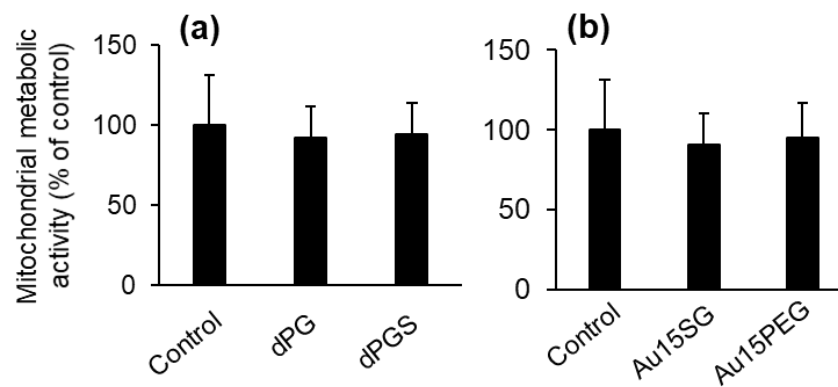

**Figure S2. (a)** Mitochondrial metabolic activity in cerebral organoids following treatment with dPG and dPGS (1  $\mu$ M, 72 h), using the MTT assay. Shown are the average percentage mitochondrial metabolic activity  $\pm$ SD. **(b)** Mitochondrial metabolic activity in cerebral organoids following treatment with gold nanoclusters Au15SG and Au15PEG (1  $\mu$ M, 72 h), using the MTT assay. Shown are the average percentage mitochondrial metabolic activity  $\pm$ SD.

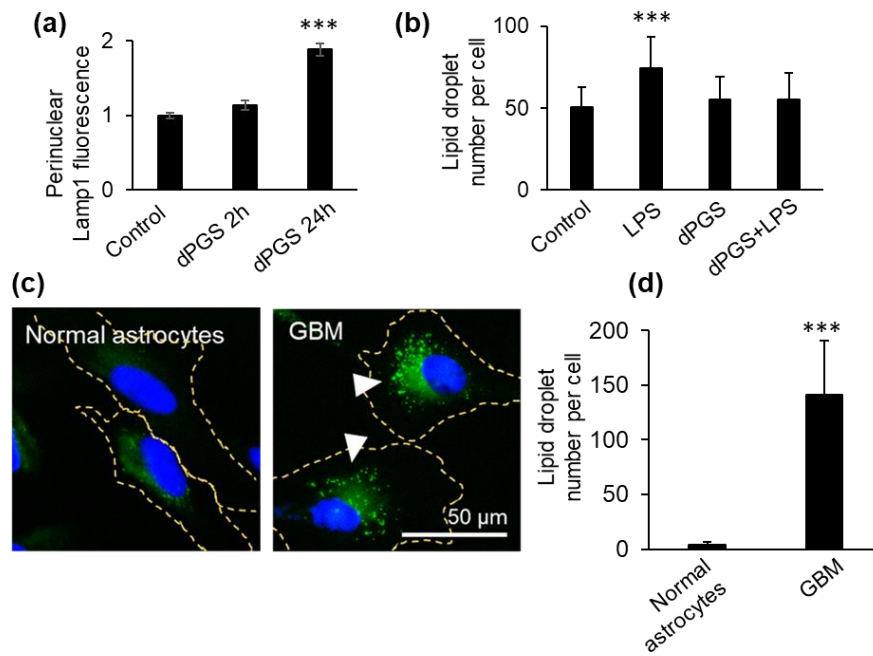

**Figure S3. (a)** Increase in microglial perinuclear lysosomal marker Lamp1 in response to dPGS treatment. Human HMC3 microglia were treated with dPGS (1  $\mu$ M) for 2 h or 24 h, then Lamp1 was fluorescently labeled by immunocytochemistry. Cells were imaged using a fluorescent microscope and perinuclear signal (within 5  $\mu$ m of the nucleus) was measured in ImageJ. Shown are the average perinuclear Lamp1 signal per cell  $\pm$ SEM. 356 cells were analyzed from two independent experiments. \*\*\* $p$ <0.001 **(b)** Increase in microglial lipid droplet numbers in response to LPS and normalization of lipid droplet numbers with dPGS. Human HMC3 microglia were treated with LPS (10 ng/mL) with or without dPGS (1  $\mu$ M) for 24 h, after which lipid droplets were fluorescently labeled with BODIPY 493/503 and imaged using a fluorescence microscope. The number of lipid droplets per cell was counted manually. Shown are the average number of lipid droplets per cell  $\pm$ SEM. At least 250 cells from three independent experiments were analyzed. \*\*\* $p$ <0.001 **(c)** Fluorescence micrographs of lipid droplets in human primary astrocytes and U251N glioblastoma (astrocytoma) cells. Lipid droplets were labelled as in (b) and imaged using a fluorescence microscope. **(d)** Shown are the average number of lipid droplets in human primary astrocytes and glioblastoma cells  $\pm$ SD. 51 cells were analyzed from two independent experiments. \*\*\* $p$ <0.001

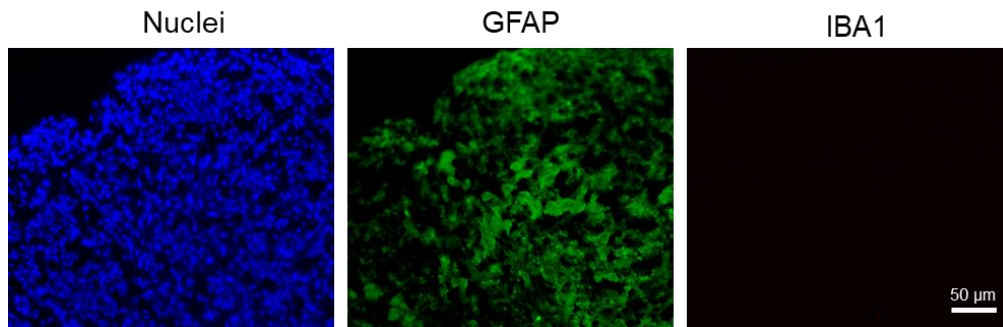

**Figure S4.** Absence of microglia from the cerebral organoids, as shown by IBA1 labeling. Immunofluorescence staining for astrocytes with GFAP and microglia with IBA1. Staining of cell nuclei with Hoechst 33342.

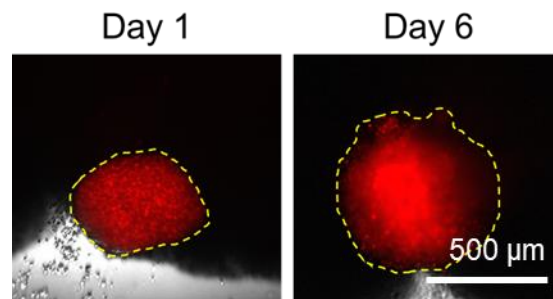

**Figure S5.** Glioblastoma tumoroid has limited invasiveness in cerebral organoids in the absence of microglia cells. Fluorescently-labeled glioblastoma tumoroids were implanted in mini-brains and imaged after 6 days for infiltrative invasiveness using a fluorescence microscope.

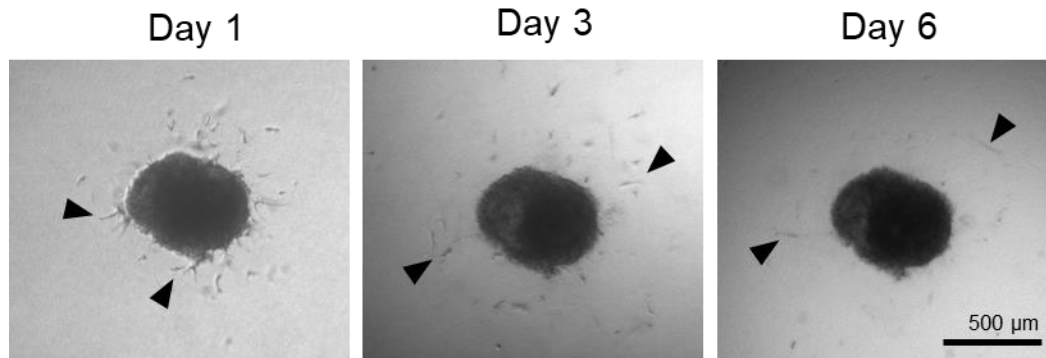

**Figure S6.** Movement of normal human astrocytes in 3D culture. Human astrocyte spheroids were implanted into collagen gels and cultured for 6 days. Spheroids were imaged using brightfield.

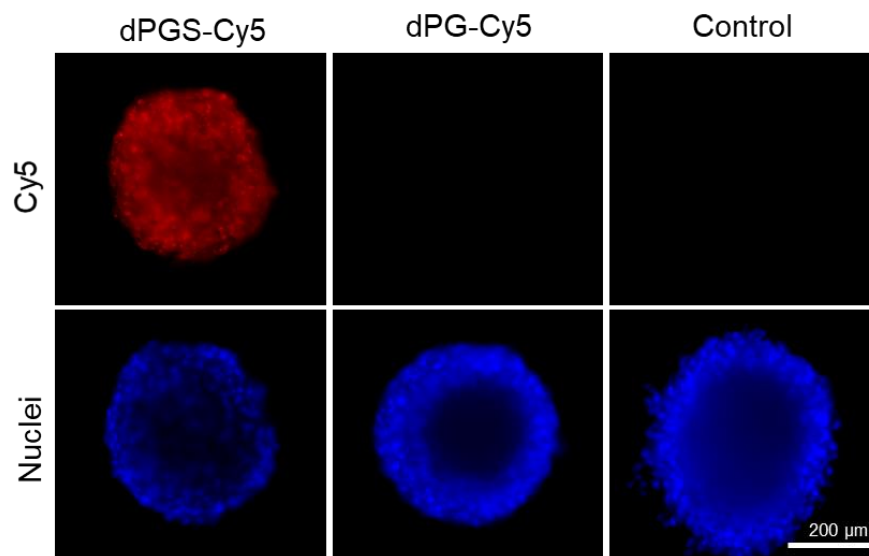

**Figure S7.** Internalization of fluorescent dPGS-Cy5 in glioblastoma tumoroids. Shown are representative fluorescence micrographs of glioblastoma tumoroids treated with dPGS-CY5 (red) or dPG-Cy5 for 24h at 1  $\mu$ M. Nuclei were labeled with Hoechst 33342 (blue). Tumoroids were imaged using a fluorescence microscope.
